# Supplementary material for: Bacteriophages are the major drivers of Shigella flexneri serotype 1c genome plasticity: a complete genome analysis
Source: PubMed Central journal article supplement (PMC5596473; doi:10.1186/s12864-017-4109-4), 2017-09-12
Supplement: 12864_2017_4109_MOESM1_ESM.pdf [file 12864_2017_4109_MOESM1_ESM.pdf]

**Table S1. List of complete *Shigella flexneri* genomes and their accession numbers used for comparative genomics.**

| <b>S.N</b> | <b><i>Shigella flexneri</i> Types (serotype and strain)</b> | <b>Accession Numbers</b> |
|------------|-------------------------------------------------------------|--------------------------|
| <b>1</b>   | <i>Shigella flexneri</i> 1a strain 0228                     | CP012735.1               |
| <b>2</b>   | <i>Shigella flexneri</i> 2a strain 2457T                    | AE014073.1               |
| <b>3</b>   | <i>Shigella flexneri</i> 2a strain 301                      | AE005674.2               |
| <b>4</b>   | <i>Shigella flexneri</i> 2a strain 981                      | CP012137.1               |
| <b>5</b>   | <i>Shigella flexneri</i> 2a strain NCTC1                    | LM651928.1               |
| <b>6</b>   | <i>Shigella flexneri</i> 4c strain 1205                     | CP012140.1               |
| <b>7</b>   | <i>Shigella flexneri</i> 5b strain 8401                     | CP000266.1               |
| <b>8</b>   | <i>Shigella flexneri</i> Xv 2002017                         | CP001383.1               |
| <b>9</b>   | <i>Shigella flexneri</i> Y strain 2003036                   | CP004056.1               |
| <b>10</b>  | <i>Shigella flexneri</i> Yv strain Shi06HN006               | CP004057.1               |
