# Supplementary material for: Bacteriophages are the major drivers of Shigella flexneri serotype 1c genome plasticity: a complete genome analysis
Source: PubMed Central journal article supplement (PMC5596473; doi:10.1186/s12864-017-4109-4), 2017-09-12
Supplement: 12864_2017_4109_MOESM3_ESM.pdf [file 12864_2017_4109_MOESM3_ESM.pdf]

**Table S2. Predicted Insertion Sequence (IS) family in Y394 genome**

| <b>IS Family</b>          | <b>Different IS(s)</b> | <b>Total IS(s)</b> |
|---------------------------|------------------------|--------------------|
| <b>IS1</b>                | 2                      | 115                |
| <b>IS110</b>              | 2                      | 7                  |
| <b>IS200_IS605</b>        | 2                      | 8                  |
| <b>IS3_ssgr_IS150</b>     | 3                      | 7                  |
| <b>IS3_ssgr_IS2</b>       | 1                      | 41                 |
| <b>IS3_ssgr_IS3</b>       | 5                      | 89                 |
| <b>IS3_ssgr_IS407</b>     | 1                      | 1                  |
| <b>IS3_ssgr_IS51</b>      | 3                      | 25                 |
| <b>IS30</b>               | 1                      | 1                  |
| <b>IS4_ssgr_IS4</b>       | 1                      | 24                 |
| <b>IS4_ssgr_IS50</b>      | 1                      | 1                  |
| <b>IS66</b>               | 1                      | 10                 |
| <b>IS91</b>               | 2                      | 10                 |
| <b>ISL3</b>               | 3                      | 3                  |
| <b>ISNCY_ssgr_ISPlu15</b> | 4                      | 4                  |
