# Supplementary material for: Bacteriophages are the major drivers of Shigella flexneri serotype 1c genome plasticity: a complete genome analysis
Source: PubMed Central journal article supplement (PMC5596473; doi:10.1186/s12864-017-4109-4), 2017-09-12
Supplement: 12864_2017_4109_MOESM4_ESM.pdf [file 12864_2017_4109_MOESM4_ESM.pdf]

**Table S3. Prophage regions identified in Y394 genome (12 regions are intact, 5 regions are incomplete, and 5 regions are questionable/putative).**

| <b>Region</b> | <b>Region Length</b> | <b>Completeness*</b>           | <b># Total Proteins</b> | <b>Region Position</b> | <b>GC content(%)</b> |
|---------------|----------------------|--------------------------------|-------------------------|------------------------|----------------------|
| <b>1</b>      | 17.9Kb               | intact                         | 23                      | 235306-253205          | 51.38                |
| <b>2</b>      | 30.8Kb               | intact ( <i>gtrI</i> cluster)  | 25                      | 307273-338131          | 47.83                |
| <b>3</b>      | 17.7Kb               | questionable                   | 10                      | 480030-497755          | 52.14                |
| <b>4</b>      | 30.1Kb               | intact                         | 25                      | 696673-726866          | 49.48                |
| <b>5</b>      | 71.6Kb               | intact                         | 106                     | 721365-793060          | 51.13                |
| <b>6</b>      | 22.3Kb               | intact                         | 16                      | 1087374-1109698        | 49.45                |
| <b>7</b>      | 14.5Kb               | questionable                   | 20                      | 1181709-1196210        | 50.68                |
| <b>8</b>      | 10Kb                 | incomplete                     | 12                      | 1359021-1369057        | 52.38                |
| <b>9</b>      | 34.9Kb               | intact                         | 32                      | 1390023-1424936        | 49.59                |
| <b>10</b>     | 32.7Kb               | intact                         | 26                      | 1402184-1434907        | 49.14                |
| <b>11</b>     | 13.8Kb               | incomplete                     | 20                      | 1569542-1583420        | 48.71                |
| <b>12</b>     | 13.6Kb               | intact                         | 21                      | 1880663-1894277        | 48.55                |
| <b>13</b>     | 30.9Kb               | intact                         | 39                      | 1916716-1947708        | 52.6                 |
| <b>14</b>     | 7.5Kb                | incomplete                     | 9                       | 2033208-2040794        | 50.63                |
| <b>15</b>     | 26.7Kb               | intact                         | 32                      | 2046655-2073385        | 48.88                |
| <b>16</b>     | 30.3Kb               | intact                         | 33                      | 2072332-2102688        | 49.3                 |
| <b>17</b>     | 15.4Kb               | questionable                   | 17                      | 2228601-2244047        | 50.39                |
| <b>18</b>     | 22.7Kb               | intact ( <i>gtrIC</i> cluster) | 23                      | 2313377-2336092        | 48.16                |
| <b>19</b>     | 8.2Kb                | incomplete                     | 8                       | 2383283-2391544        | 49.9                 |
| <b>20</b>     | 10.5Kb               | questionable                   | 12                      | 2708259-2718848        | 49.61                |
| <b>21</b>     | 6.2Kb                | incomplete                     | 9                       | 3601945-3608185        | 48.09                |
| <b>22</b>     | 28.8Kb               | questionable                   | 17                      | 4360722-4389577        | 48.61                |

\*Completeness of the prophage regions are based on the scoring method outlined in PHASTER database.
