# Supplementary material for: Bacteriophages are the major drivers of Shigella flexneri serotype 1c genome plasticity: a complete genome analysis
Source: PubMed Central journal article supplement (PMC5596473; doi:10.1186/s12864-017-4109-4), 2017-09-12
Supplement: 12864_2017_4109_MOESM6_ESM.pdf [file 12864_2017_4109_MOESM6_ESM.pdf]

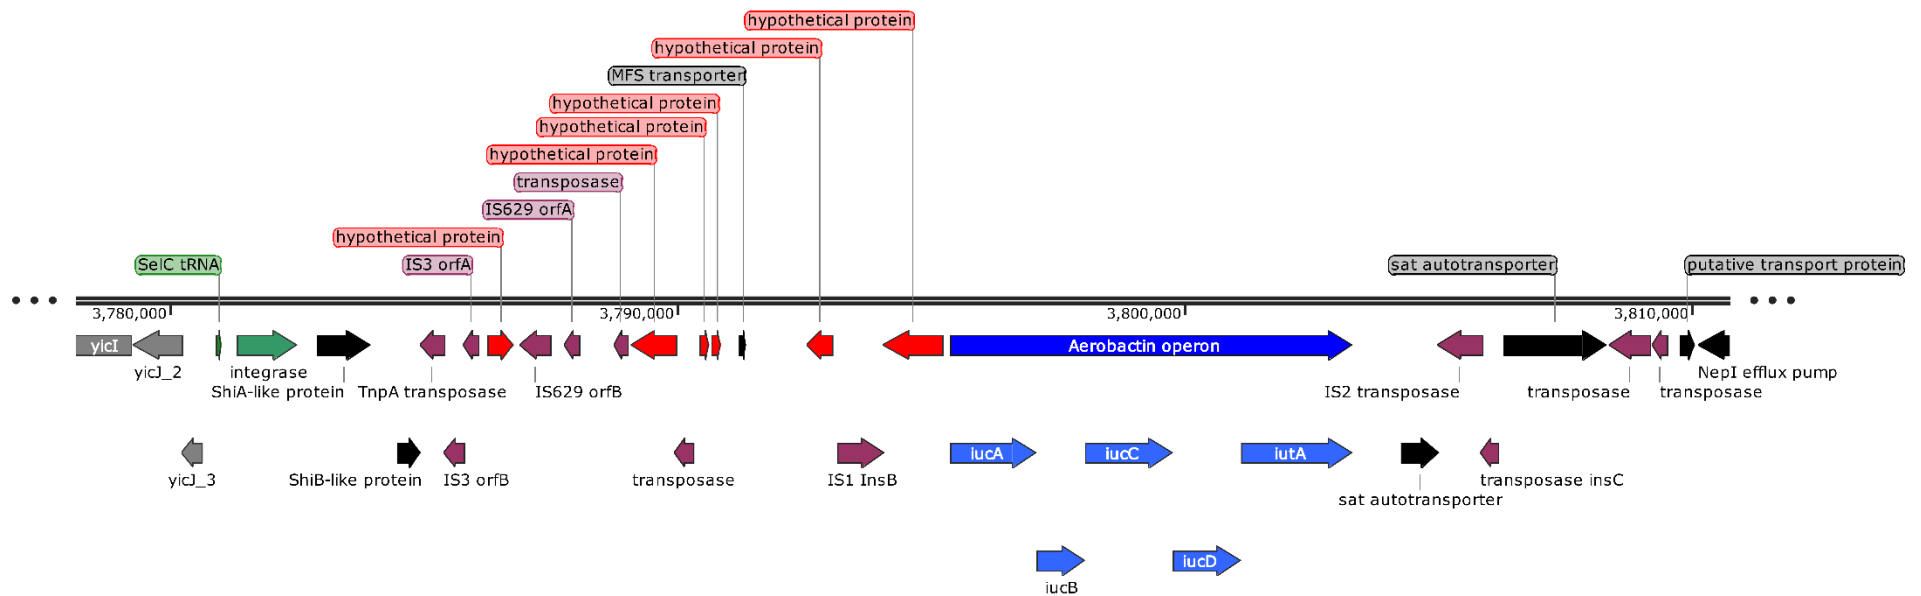

**Figure S2. Linear schematic representation of SHI-2 pathogenicity Island in Y394.** The direction of arrows indicates the orientation of open reading frames (ORFs). The color code denotes the ORF types: red, hypothetical protein; plum, transposase and IS elements, light green, tRNA; dark green, integrase; gray/black, annotated protein.
