# Supplementary material for: Bacteriophages are the major drivers of Shigella flexneri serotype 1c genome plasticity: a complete genome analysis
Source: PubMed Central journal article supplement (PMC5596473; doi:10.1186/s12864-017-4109-4), 2017-09-12
Supplement: 12864_2017_4109_MOESM8_ESM.pdf [file 12864_2017_4109_MOESM8_ESM.pdf]

**Table S5. List of complete genomes and their accession numbers of bacterial strains used additionally for phylogenetics.**

| <b>S.N</b> | <b>Bacterial species</b>                           | <b>Accession Numbers</b> |
|------------|----------------------------------------------------|--------------------------|
| <b>1</b>   | <i>Escherichia coli</i> O157:H7 strain WS4202      | CP012802.1               |
| <b>2</b>   | <i>Escherichia coli</i> strain K-12 substr. MG1655 | NC_000913.3              |
| <b>3</b>   | <i>Klebsiella pneumoniae</i> strain HS11286        | CP003200.1               |
| <b>4</b>   | <i>Klebsiella pneumoniae</i> strain MGH 78578      | NC_009648.1              |
| <b>5</b>   | <i>Salmonella enterica</i> strain SL1344           | FQ312003.1               |
| <b>6</b>   | <i>Salmonella enterica</i> strain LT2              | NZ_CP014051.1            |
| <b>7</b>   | <i>Shigella boydii</i> 4 strain Sb227              | CP000036.1               |
| <b>8</b>   | <i>Shigella boydii</i> strain ATCC 9210            | CP011511.1               |
| <b>9</b>   | <i>Shigella dysenteriae</i> strain 1617            | CP006736.1               |
| <b>10</b>  | <i>Shigella dysenteriae</i> strain Sd197           | CP000034.1               |
| <b>11</b>  | <i>Shigella sonnei</i> strain FDAARGOS_90          | CP014099.1               |
| <b>12</b>  | <i>Shigella sonnei</i> strain Ss046                | CP000038.1               |
