# Supplementary material for: Bacteriophages are the major drivers of Shigella flexneri serotype 1c genome plasticity: a complete genome analysis
Source: PubMed Central journal article supplement (PMC5596473; doi:10.1186/s12864-017-4109-4), 2017-09-12
Supplement: 12864_2017_4109_MOESM9_ESM.pdf [file 12864_2017_4109_MOESM9_ESM.pdf]

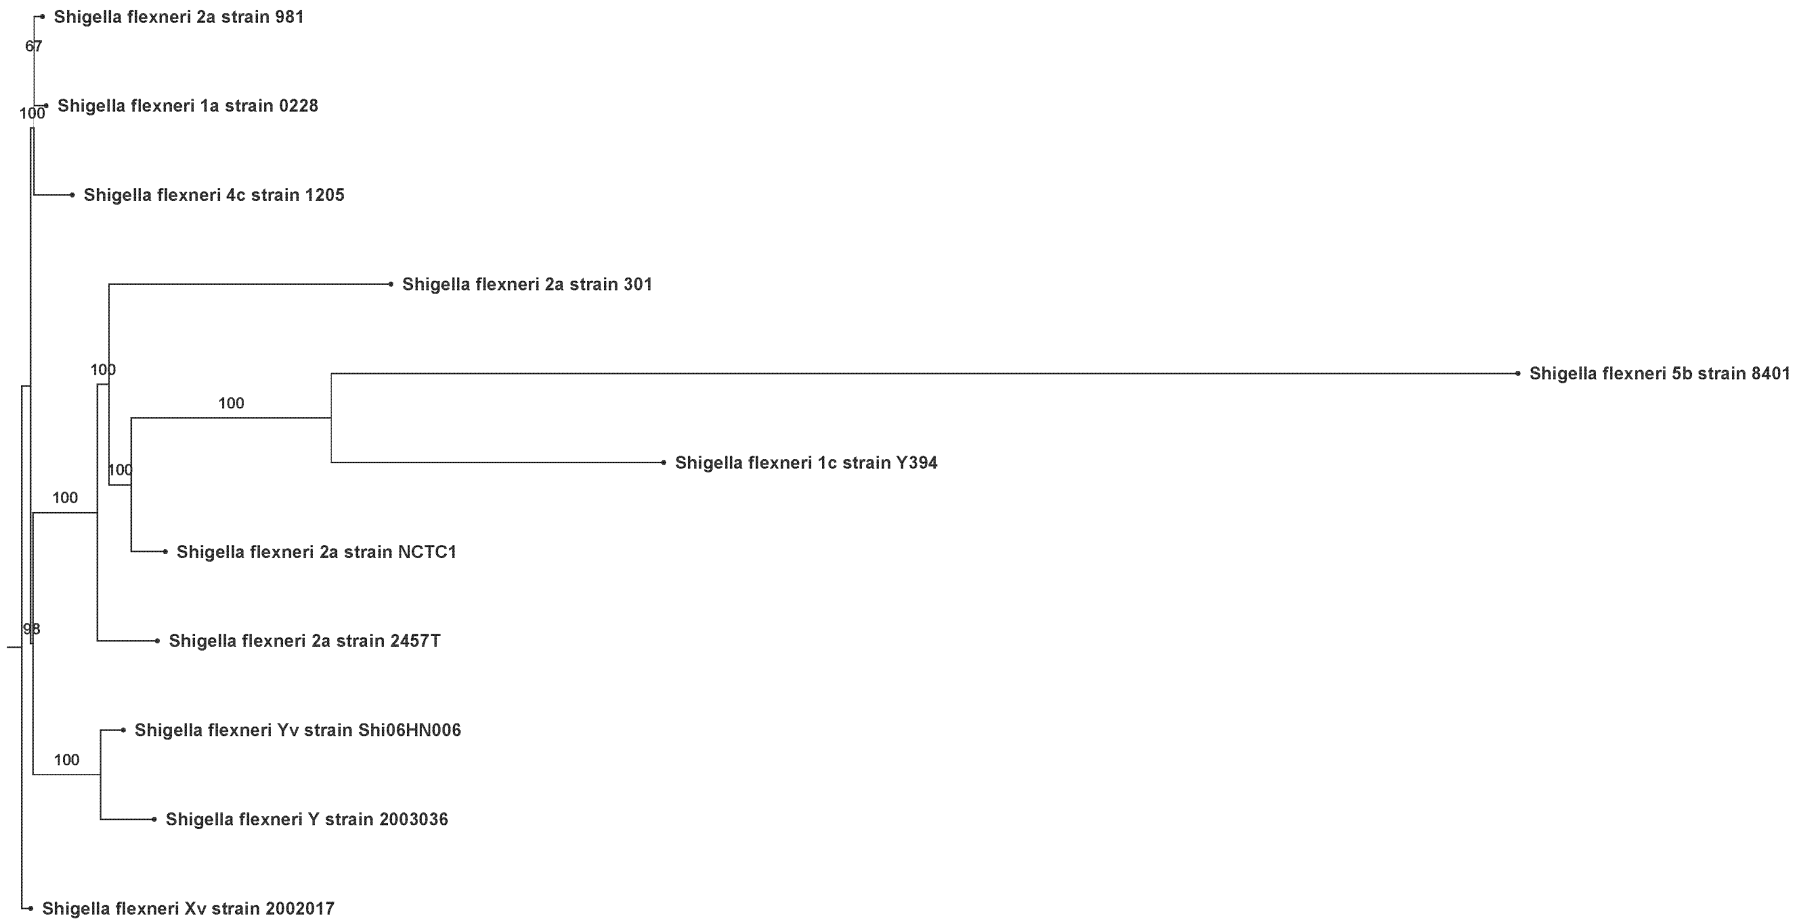

**Figure S4.** The phylogenetic relationship of *Shigella flexneri*. The maximum likelihood tree of eleven *Shigella flexneri* genomes based on 6,387 SNP sites of the 3,720 core genes. The numbers represent the bootstrap support values of 1000 pseudo-replicates.
