# Supplementary material for: Bacteriophages are the major drivers of Shigella flexneri serotype 1c genome plasticity: a complete genome analysis
Source: PubMed Central journal article supplement (PMC5596473; doi:10.1186/s12864-017-4109-4), 2017-09-12
Supplement: 12864_2017_4109_MOESM10_ESM.pdf [file 12864_2017_4109_MOESM10_ESM.pdf]

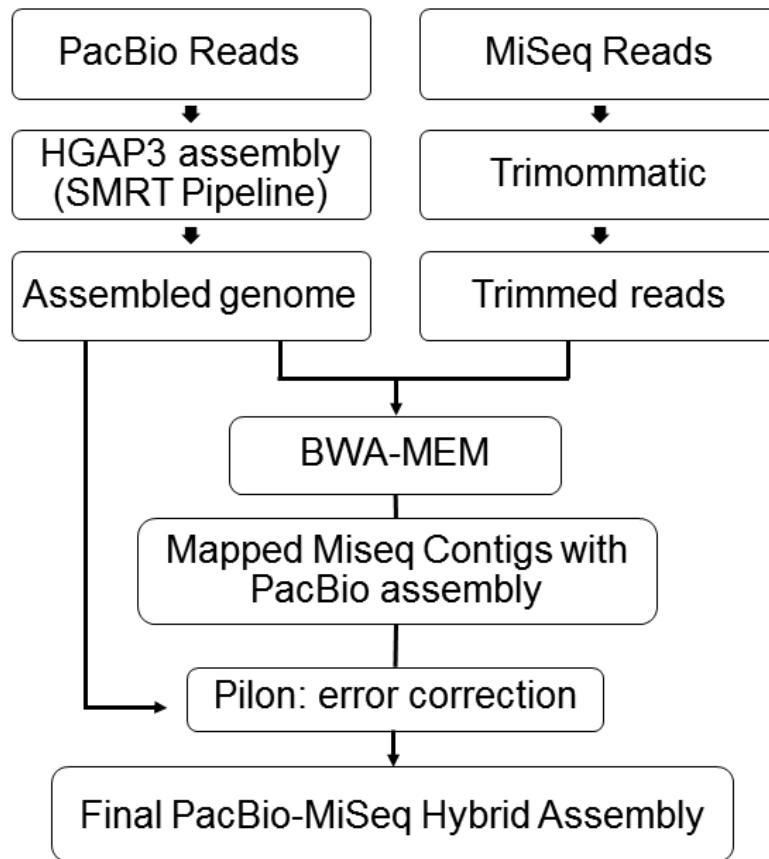

**Figure S5. Flowchart depicting PacBio-MiSeq hybrid genome assembly.** The arrows indicate the sequential steps used for assembly.
