# Supplementary material for: Bacteriophages are the major drivers of Shigella flexneri serotype 1c genome plasticity: a complete genome analysis
Source: BMC Genomics. 2017 Sep 12;18:722. doi: 10.1186/s12864-017-4109-4 (PMC5596473; doi:10.1186/s12864-017-4109-4)
Supplement: Supplementary file 5 — Pathogenicity Islands in Shigella flexneri genomes. (PDF 158 kb) [file 12864_2017_4109_MOESM5_ESM.pdf]

**Table S4. Pathogenicity Islands in *Shigella flexneri* genomes.**

[illegible]
